# Supplementary material for: Chronic lymphocytic leukemias with trisomy 12 show a distinct DNA methylation profile linked to altered chromatin activation
Source: PubMed Central journal article supplement — Haematologica. 2020 Feb 27;105(12):2864–7. doi: 10.3324/haematol.2019.240721 (PMC7716362; doi:10.3324/haematol.2019.240721), 2020-02-27
Supplement: 2019_240721-Disclosures_Contributions.pdf [file 2019_240721-Disclosures_Contributions.pdf]

Haematologica  
HAEMATOL/2019/240721  
Version 3

Chronic lymphocytic leukemias with trisomy 12 show a distinct DNA  
methylation profile linked to altered chromatin activation

Maria Tsagiopoulou, Vicente Chapaprieta, Martí Duran-Ferrer,  
Theodoros Moysiadis, Fotis Psomopoulos, Panagoula Kollia, Nikos  
Papakonstantinou, Elias Campo, Kostas Stamatopoulos, and Jose I.  
Martin-Subero

Disclosures: Kostas Stamatopoulos received research support from Janssen  
Pharmaceuticals and Roche SA. All other authors declare no conflict of interest

Contributions: M.T. performed the study and wrote the manuscript; V.P. performed data  
analysis and assisted in data interpretation; M.D-F., T.M., F.P., P.K., N.P., and E.C.  
assisted in research, data analysis, and interpretation; K.S. designed and supervised the  
research and revised the manuscript, J.I.M.S. designed and supervised the research,  
assisted in data interpretation and wrote the manuscript.
